# Supplementary material for: Glucagon receptor signaling regulates weight loss via central KLB receptor complexes
Source: PubMed Central journal article supplement (PMC7934938; doi:10.1172/jci.insight.141323), 2021-02-22
Supplement: jciinsight-6-141323-s030.pdf [file jciinsight-6-141323-s030.pdf]

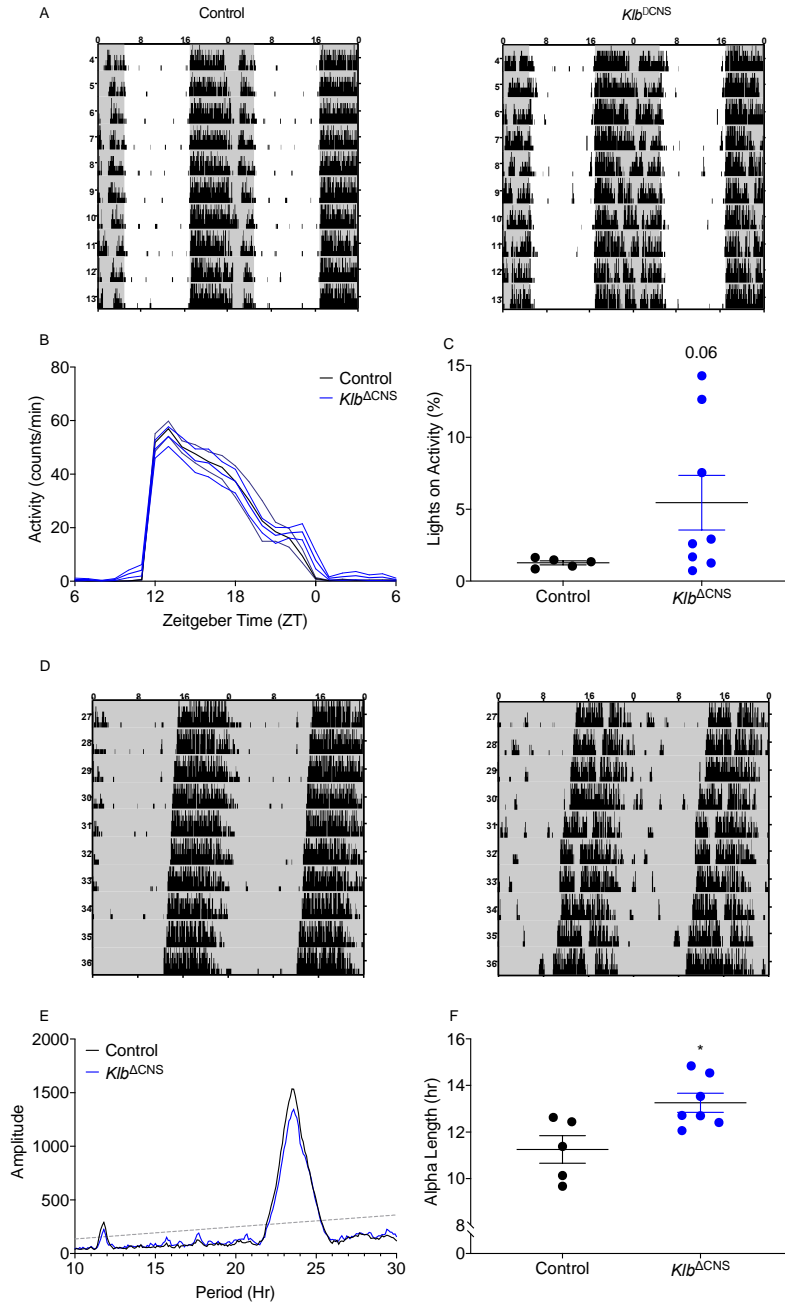

Supplementary Figure 1. Circadian Locomotor Behavior in *Klb<sup>ΔCNS</sup>* mice

Representative light-dark double plotted actograms of wheel-running activity for control (left) and *Klb<sup>ΔCNS</sup>* mice (right) (A). Average wave plots summarizing wheel-running light-dark activity (B) and % lights on activity (C) (n=5-8). Representative free-running double plotted actograms in constant dark (D). Representative  $\chi^2$  periodogram (E) and average alpha length (F; n=5-7) in control and *Klb<sup>ΔCNS</sup>*. All data are represented as mean  $\pm$  SEM. \*p<0.05, Student's t-test

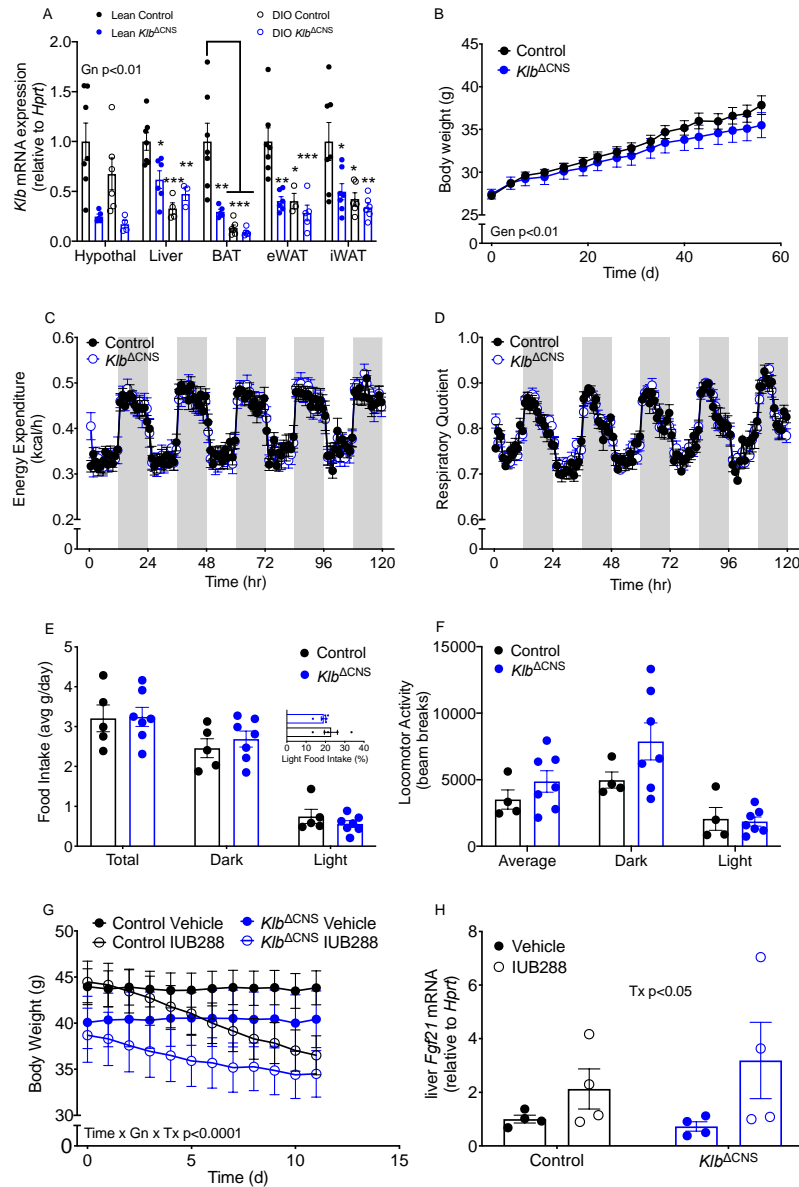

Supplementary Figure 2. Diet-induced obesity and GCGR agonism in *Klb*<sup>ΔCNS</sup> mice

*Klb* expression in lean, chow-fed mice (8wk-old n=5-7) and DIO, HFD-fed mice (16wk-old mice n=4-6) (A). Absolute body weight (B) in control and *Klb*<sup>ΔCNS</sup> fed HFD for 8wk (n=10-14). Diurnal EE (C), respiratory quotient (D), food intake (E) and % light food intake (E inset), and locomotor activity (F) in control and *Klb*<sup>ΔCNS</sup> for remaining 7d of HFD after 3d chow (n=5-7). Absolute body weight (G) in control and *Klb*<sup>ΔCNS</sup> mice treated with IUB288 for 12d. Liver *Fgf21* expression (H) after 12d IUB288 in control and *Klb*<sup>ΔCNS</sup> mice. All data are represented as mean ± SEM, \*p<0.05, \*\*p<0.01, \*\*\*p<0.001 compared to lean vehicle controls, two-way ANOVA. Panel A: Main effect of genotype (p<0.01). Panel B: Main effect of genotype in hypothalamus (p<0.01). Panel G: Main effect of treatment (p<0.05). GCGR Agonist: IUB288

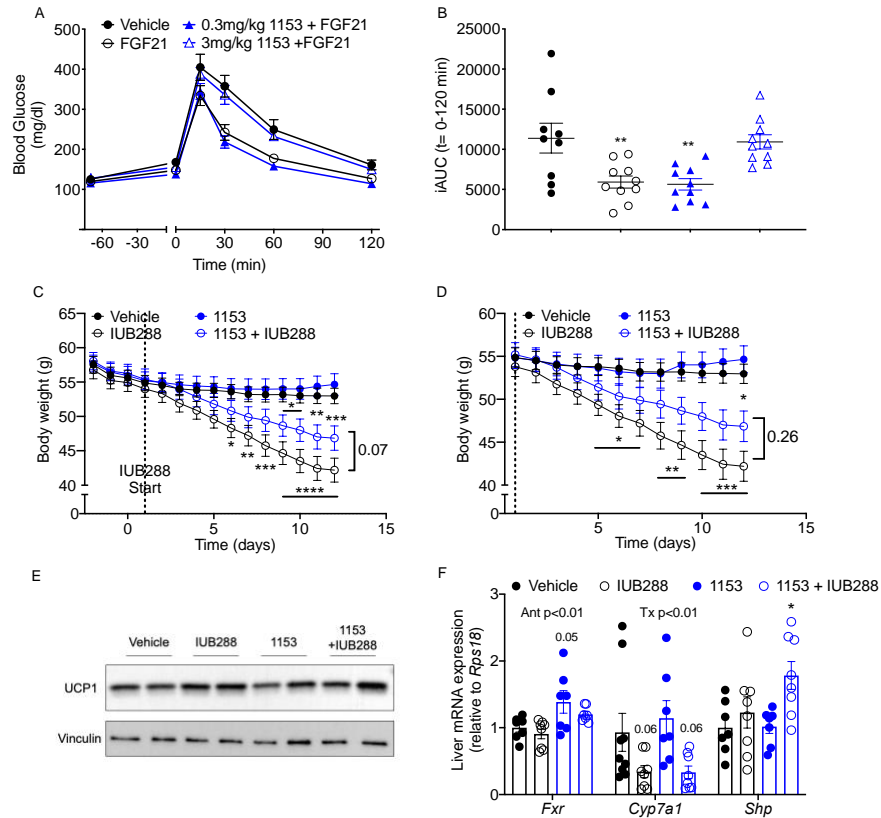

Supplementary Figure 3. GCGR-agonism in mice with KLB Antagonism

Glucose tolerance test (A, 5h fast) and iAUC (B) in 10wk-old lean mice (n=10). 1153 (0.3mg/kg or 3mg/kg) or vehicle administered at t=-70m and FGF21 or vehicle administered at t=-60m, before glucose (2g/kg) administered at t=0m. Absolute body weight in control and 1153 DIO mice from ICV surgery start (C; t=-2d) and from IUB288 start (D) (n=12-14). Dotted line indicates start of IUB288 (t=1d). Representative BAT UCP1 from 6 individual samples (E) and gene expression of Liver *Fxr* and downstream *Fxr*-targets (F; n=7-9). \*p<0.05, \*\*p<0.01, \*\*\*p<0.001, \*\*\*\*p<0.0001 compared to respective genotypic controls. #p<0.05, ##p<0.01, ####p<0.0001 between IUB288 and 1153 + IUB288 groups, two-way ANOVA. Panel E: main effect of 1153 (p<0.01) on *Fxr* and main effect of treatment on *Cyp7a1* (p<0.01). GCGR Agonist: IUB288. KLB Antagonist: 1153.

Supplementary Table 1. qPCR primers

| <b>Gene</b>    | <b>Forward (5'-3')</b>         | <b>Reverse (5'-3')</b>          |
|----------------|--------------------------------|---------------------------------|
| <i>Abca1</i>   | CGT TTC CGG GAA GTG TCC TA     | GCT AGA GAT GAC AAG GAG GAT GGA |
| <i>Acaca</i>   | CTT CCT GAC AAA CGA GTC TGG    | CTG CCG AAA CAT CTC TGG GA      |
| <i>Hmgcr</i>   | GTG TTC AAG GAG CAT GCA AAG    | AGC CAT CAC AGT GCC ACA TAC     |
| <i>Srebp-1</i> | GAG GAC CTT TGT CAT TGG CTG    | TAC AGA GCA AGA GGG TGC CAT     |
| <i>Fxr</i>     | CAC AGC GAT CGT CAT CCT CTC T  | TCT CAG GCT GGT ACA TCT TGC A   |
| <i>Cyp7a1</i>  | GGG ATT GCT GTG GTA GTG AGC    | GGT ATG GAA TCA ACC CGT TGT C   |
| <i>Shp</i>     | CAT GGC CTC TAC CCT CAA GAA C  | GTC ACC TCA GCA AAA GCA TGT C   |
| <i>Rps18</i>   | TTC TGG CCA ACG GTC TAG ACA AC | CCA GTG GTC TTG GTG TGC TGA     |
